# Supplementary material for: Metal-electrode-free Window-like Organic Solar Cells with p-Doped Carbon Nanotube Thin-film Electrodes
Source: PubMed Central journal article supplement (PMC4985658; doi:10.1038/srep31348), 2016-08-16
Supplement: srep31348-s1.pdf [file srep31348-s1.pdf]

*Supplementary Information*

**Metal-electrode-free Window-like Organic Solar Cells with  
p-Doped Carbon Nanotube Thin-film Electrodes**

Il Jeon<sup>1</sup>, Clement Delacou<sup>2</sup>, Antti Kaskela<sup>3</sup>, Esko I. Kauppinen<sup>3</sup>, Shigeo Maruyama<sup>2,4</sup>,  
and Yutaka Matsuo<sup>1,2,5\*</sup>

1: *Department of Chemistry, School of Science, The University of Tokyo, 7-3-1 Hongo, Bunkyo-ku, Tokyo 113-0033, Japan*

2: *Department of Mechanical Engineering, School of Engineering, The University of Tokyo, 7-3-1 Hongo, Bunkyo-ku, Tokyo 113-8656, Japan*

3: *Department of Applied Physics, Aalto University School of Science, 15100, FI-00076 Aalto, Finland*

4: *National Institute of Advanced Industrial Science and Technology (AIST), 1-2-1 Namiki, Tsukuba, 305-8564, Japan*

5: *University of Science and Technology of China, Hefei, Anhui 230026, China*

**Contents:**

**1. Photoluminescence data**

**2. UV-vis and IPCE data**

**3. Direct application of HNO<sub>3</sub>(aq) on SWNT-based transparent OSC**

**4. Bridged SWNT**

**5. AFM images of micro-wrinkles**

**6. Cross-sectional SEM images**

**7. J-V curves of 60% transparent SWNT-based transparent OSCs**

**8. Device pictures**

## 1. Photoluminescence data

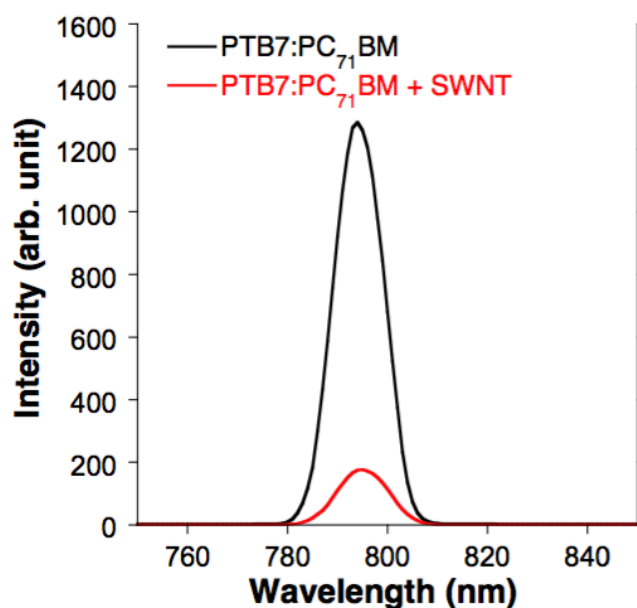

**Figure S1.** Photoluminescence spectrum of PTB7:PC<sub>71</sub>BM active layer is subdued when SWNT film is over-coated on the very same active layer.

## 2. UV-vis and IPCE data

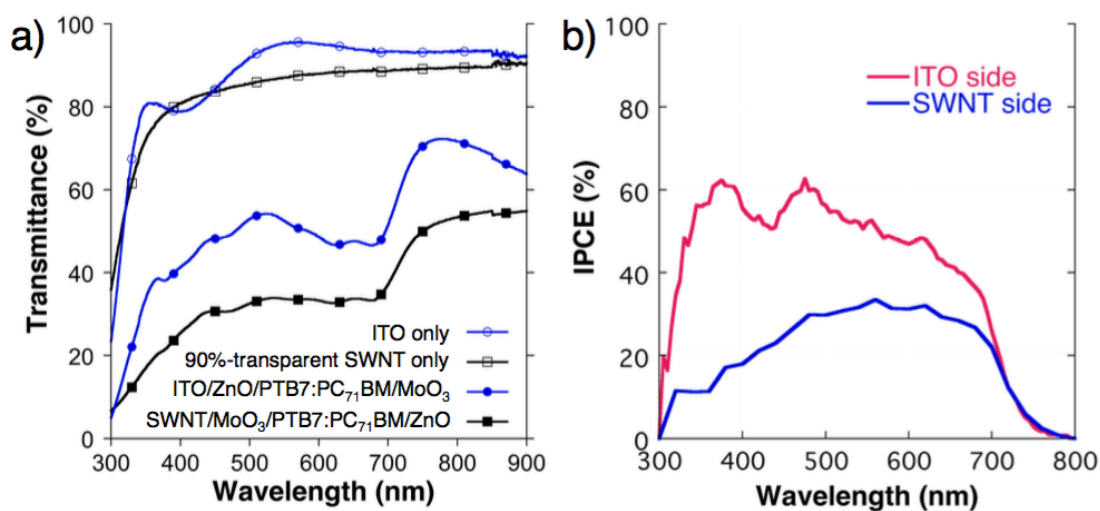

**Figure S2.** a) UV-vis transmittance measurement spectra of glass/ITO, glass/90%-SWNT, glass/ITO/ZnO/PTB7:PC<sub>71</sub>BM/MoO<sub>3</sub>, and glass/90%-SWNT/MoO<sub>3</sub>/PTB7:PC<sub>71</sub>BM/ZnO. b) IPCE measurement spectra of transparent OSCs when light is shone from ITO side and when light is shone from SWNT side.

### 3. Direct application of $\text{HNO}_3(\text{aq})$ on SWNT-based transparent OSC

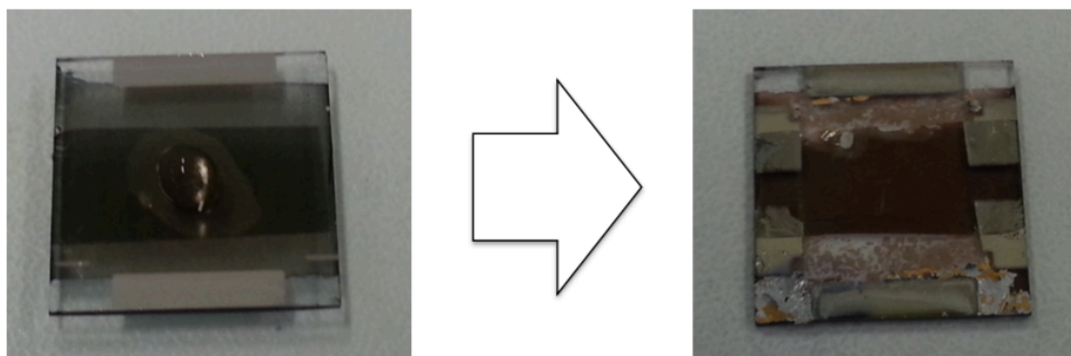

**Figure S3.** Application of  $\text{HNO}_3(\text{aq})$  directly onto a SWNT-based transparent OSC (left) will lead to a holistic destruction of the device system (right) within 5 h.

### 4. Bridged SWNT

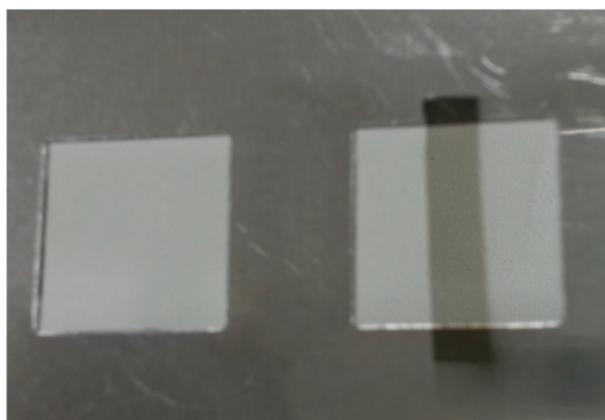

**Figure S4.** A picture of a SWNT film bridged on a holder.

## 5. AFM images of micro-wrinkles

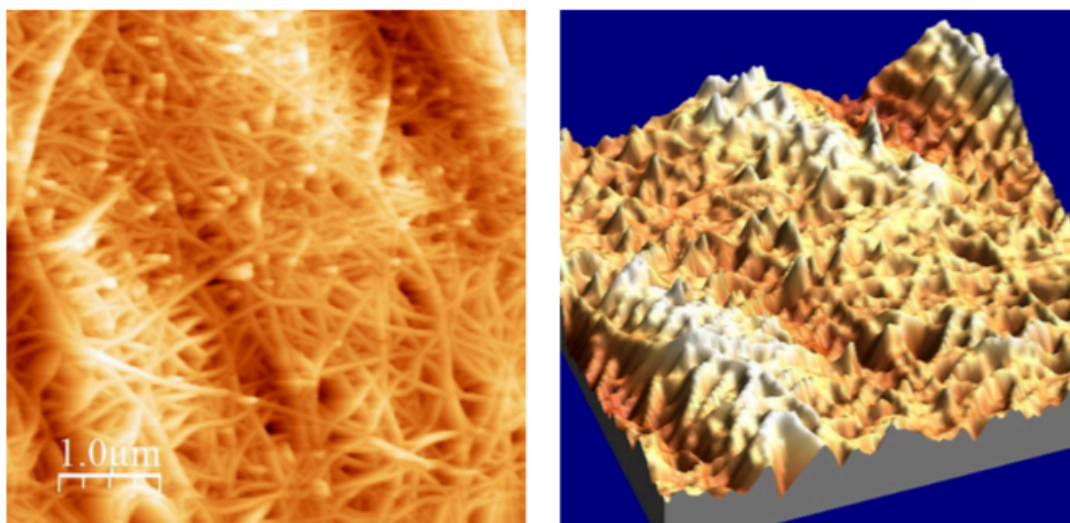

**Figure S5.** AFM 2D image (left) and 3D image (right) of micro wrinkles formed on bridge-transferred SWNT.

## 6. Cross-sectional SEM images

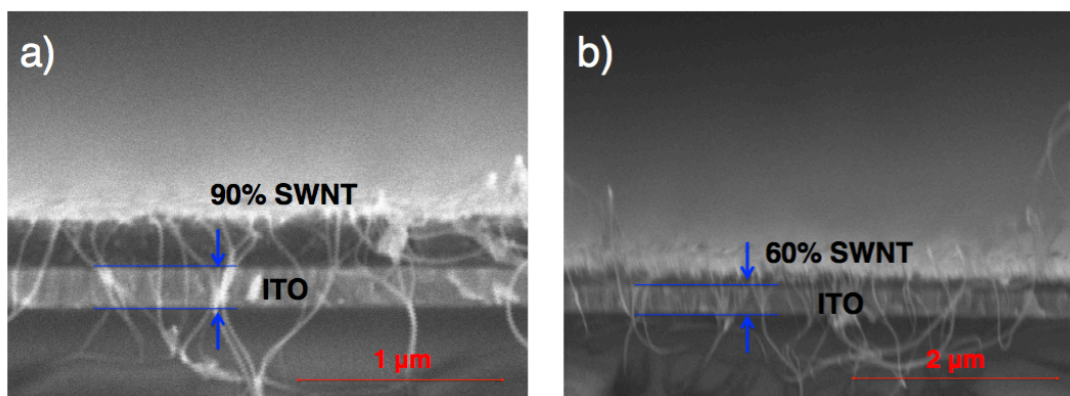

**Figure S6.** Cross-sectional SEM images of transparent OSC devices with a) a 90%-SWNT film and b) a 60%-SWNT film.

## 7. Device pictures

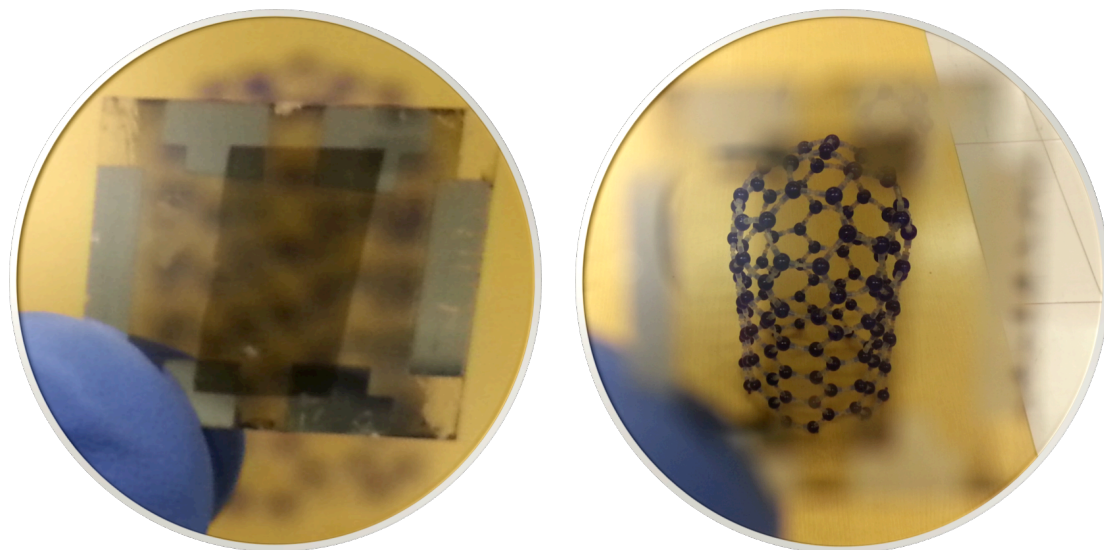

**Figure S7.** Pictures of 60% transparent SWNT-based transparent OSC when focused on the device (left) and on a behind object, the SWNT plastic model (right).
